# Supplementary material
Source: Springer Nature journal article supplement (https://www.springermedizin.de/resource/supplementary/12943_2013_1112_MOESM1_ESM.pdf/9552520)
Supplement: MOESM1 [file 9552520]

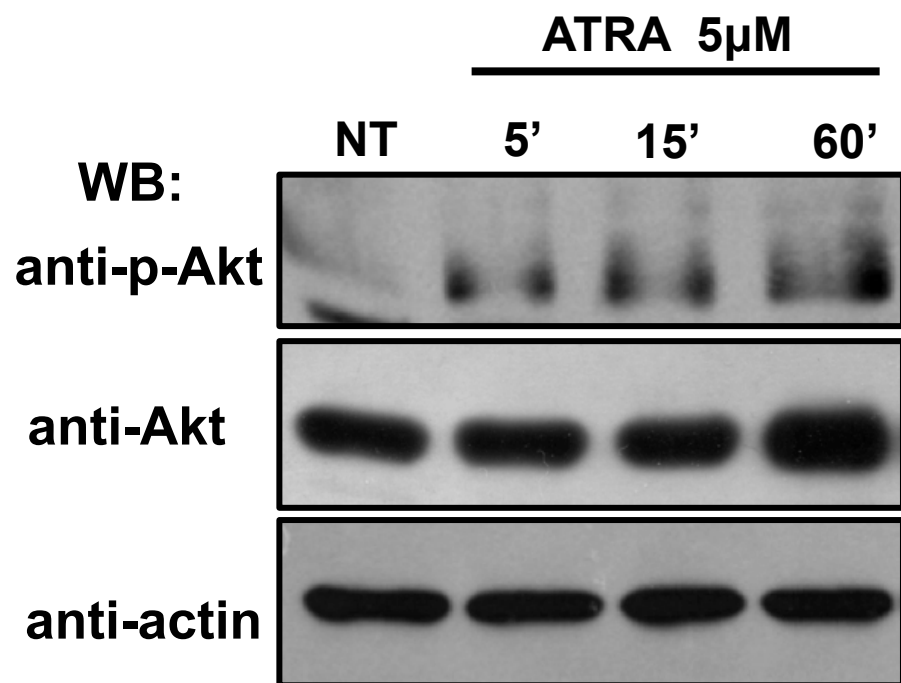

**H1944**

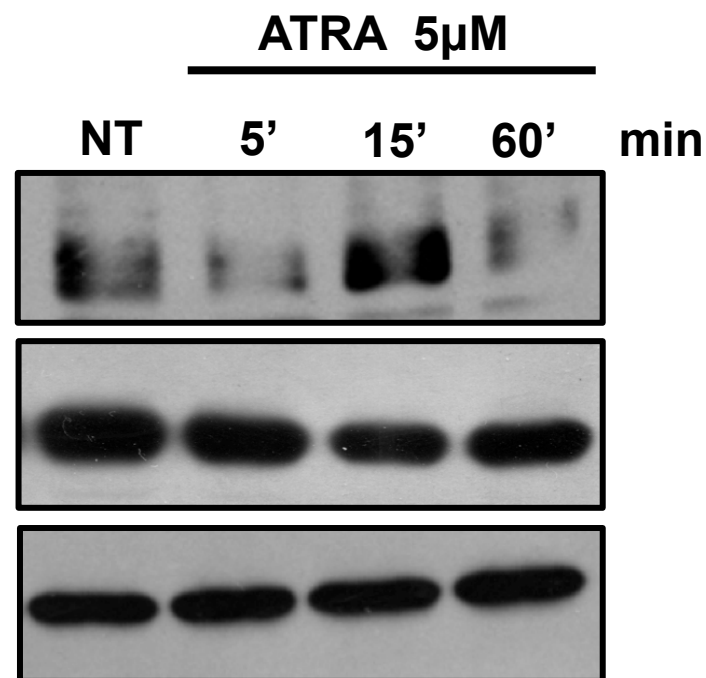

**NL-20**

**Figure S1**
